# Supplementary material for: Reassessing the bulk ionic conductivity of solid-state electrolytes
Source: Royal Society of Chemistry journal article supplement (doi:10.1039/c8se00139a), 2018-01-01
Supplement: c8se00139a1.pdf [file c8se00139a1.pdf]

## Supporting Information

### Reassessing the bulk ionic conductivity of solid state electrolytes

Md-Jamal Uddin <sup>a</sup>, Sung-Jin Cho<sup>\*a</sup>

<sup>a</sup> Joint School of Nanoscience and Nanoengineering, North Carolina A&T State University, Greensboro, NC

\*Corresponding Author. E-mail Address: [scho1@ncat.edu](mailto:scho1@ncat.edu)

## Experimental

### Materials

Li(OH), La<sub>2</sub>O<sub>3</sub>, Al<sub>2</sub>O<sub>3</sub>, and ZrO<sub>2</sub> were purchased from Sigma-Aldrich Chemical Co. LLC. The Al<sub>2</sub>O<sub>3</sub> was 13nm particle size. All precursors were reagent grade. Li(OH) and La<sub>2</sub>O<sub>3</sub> were kept in an Argon filled glovebox to avoid air and moisture exposure. Isopropyl alcohol was purchased from Fisher Scientific Inc. (70% v/v) and used as it is. For comparison, a commercial LLZO was also used which was collected from Toshima Manufacturing Co. Ltd., Japan (purity 99.9%).

### Synthesis of the Solid-State Electrolyte

Li(OH), La<sub>2</sub>O<sub>3</sub>, Al<sub>2</sub>O<sub>3</sub>, and ZrO<sub>2</sub> were mixed in isopropyl alcohol in a stoichiometric ratio of Li<sub>7</sub>La<sub>3</sub>Zr<sub>2</sub>O<sub>12</sub>, with 0.2 mol.% of Al replacing Zr and an excess of 60 wt.% Li(OH) to compensate Li loss during the calcination. The mixing was obtained in a planetary mill using zirconia jars and balls. The mixing time was 12 hours, and the ball to powder ratio was maintained as 20:1. The slurry was spray dried (Yamato GB-22) with inlet and outlet temperature of 175 °C and 90 °C respectively. The powder was calcined in an alumina crucible at 900 °C for 12 hours, and further ball milled to obtain the LLZO powder. Pellets were made by pressing LLZO powder with 10-ton pressure for 15 mins. The diameter of the pellet was 19 mm, and the thickness was 1– 1.5 mm.

### Materials and Electrochemical Characterizations

Phase analysis was done using an X-ray diffractometer (Bruker AXS) using Cu K $\alpha$  radiation. Morphology of the LLZO powders were studied using a field emission SEM (Carl Zeiss Auriga-BU). For the EIS measurements, the pellet was placed between two gold-coated copper plates in air (ion blocking electrode) or two lithium foils in argon environment (non ion-blocking electrode) with glass slides on the outer sides. EIS was performed with an electrochemical workstation (Bio-Logic SP300) from different HFL to 10 Hz with a 500 mV perturbation amplitude at different temperatures. From the Nyquist plot of impedance, the ionic conductivity was calculated by using the equation:  $\sigma = d / (R_b \times A)$ ; where  $\sigma$  is the ionic conductivity in S/cm,  $d$  is the thickness of the pellet in cm,  $R_b$  is the bulk resistance in  $\Omega$ , and  $A$  is the area of the pellet in cm<sup>2</sup>.

Table S1: Frequency limit and corresponding ionic conductivity of different solid-state electrolytes. The list is merely comprehensive, and only represents a brief overview of the current state-of-the-art solid electrolyte studies in lithium ion batteries.

| Sl. No. | Name of the Solid-State Electrolyte (SSE)                                                              | Higher Frequency Limit (kHz) | Lower Frequency Limit (Hz) | Ionic Conductivity (S/cm) | Type of the SSE | Year | Ref. |
|---------|--------------------------------------------------------------------------------------------------------|------------------------------|----------------------------|---------------------------|-----------------|------|------|
| 1       | $\text{Li}_{7-x}\text{La}_3\text{Zr}_2\text{O}_{12-1/2x}$                                              | 1.0E+03                      | 1.0E-01                    | 5.7E-04                   | Garnet          | 2011 | 1    |
| 2       | $\text{Li}_7\text{La}_3\text{Zr}_2\text{O}_{12}$                                                       | 7.0E+03                      | 1.0E+00                    | 4.0E-04                   | Garnet          | 2011 | 2    |
| 3       | $\text{Li}_{6.75}\text{La}_3\text{Zr}_{1.75}\text{Ta}_{0.25}\text{O}_{12}$                             | 1.0E+03                      | 1.0E+00                    | 8.7E-04                   | Garnet          | 2012 | 3    |
| 4       | $\text{Li}_{6.15}\text{La}_3\text{Zr}_{1.75}\text{Ta}_{0.25}\text{Ga}_{0.2}\text{O}_{12}$              | 1.0E+03                      | 1.0E+00                    | 8.7E-04                   | Garnet          | 2012 | 3    |
| 5       | t- $\text{Li}_7\text{La}_3\text{Zr}_2\text{O}_{12}$                                                    | 1.0E+03                      | 1.0E+00                    | 2.3E-05                   | Garnet          | 2012 | 4    |
| 6       | $\text{Li}_7\text{La}_3\text{Zr}_2\text{O}_{12}$                                                       | 1.0E+03                      | 1.0E+01                    | 1.7E-04                   | Garnet          | 2012 | 5    |
| 7       | $\text{Li}_{7-x}\text{La}_3\text{Ce}_x\text{Zr}_2\text{O}_{12}$                                        | 8.0E+02                      | 1.0E+01                    | 1.4E-05                   | Garnet          | 2013 | 6    |
| 8       | $\text{Li}_7\text{La}_3\text{Zr}_2\text{O}_{12}$                                                       | 8.0E+02                      | 1.0E+01                    | 4.0E-04                   | Garnet          | 2013 | 7    |
| 9       | $\text{Li}_{6.16}\text{Al}_{0.28}\text{La}_3\text{Zr}_2\text{O}_{12}$                                  | 1.5E+04                      | 2.0E+01                    | 6.1E-04                   | Garnet          | 2014 | 8    |
| 10      | $\text{Li}_7\text{La}_3\text{Zr}_2\text{O}_{12}$                                                       | 1.0E+02                      | 1.0E+00                    | 2.5E-04                   | Garnet          | 2014 | 9    |
| 11      | $\text{Li}_7\text{La}_3\text{Zr}_2\text{O}_{12}$                                                       | 1.0E+03                      | 5.0E-02                    | 4.9E-04                   | Garnet          | 2014 | 10   |
| 12      | $\text{Li}_7\text{La}_3\text{Zr}_2\text{O}_{12}$                                                       | 1.0E+03                      | 1.0E-01                    | 5.2E-04                   | Garnet          | 2014 | 11   |
| 13      | $\text{Li}_7\text{La}_3\text{Zr}_2\text{O}_{12}$                                                       | 7.0E+03                      | 1.0E+00                    | 4.6E-04                   | Garnet          | 2016 | 12   |
| 14      | $\text{Li}_7\text{La}_3\text{Zr}_2\text{O}_{12}$                                                       | 5.0E+03                      | 1.0E+02                    | 2.0E-04                   | Garnet          | 2016 | 13   |
| 15      | $\text{Li}_3\text{ClO}$                                                                                | 5.0E+03                      | 1.0E-01                    | 2.5E-02                   | Halide          | 2014 | 14   |
| 16      | $\text{LiGe}_2(\text{PO}_4)_3$                                                                         | 1.0E+03                      | 1.0E-02                    | 1.0E-04                   | NASICON         | 1997 | 15   |
| 17      | $\text{Li}_{1.5}\text{Al}_{0.5}\text{Ge}_{1.5}(\text{PO}_4)_3$                                         | 1.0E+04                      | 1.0E-01                    | 7.3E-04                   | NASICON         | 2007 | 16   |
| 18      | $\text{Li}_{1.4}\text{Al}_{0.4}\text{Ti}_{1.6}(\text{PO}_4)_3$                                         | 1.0E+03                      | 1.0E-01                    | 1.1E-03                   | NASICON         | 2008 | 17   |
| 19      | $\text{Li}_{1+x}\text{Al}_x\text{Ge}_{2-x}(\text{PO}_4)_3$                                             | 1.0E+03                      | 1.0E-02                    | 5.1E-03                   | NASICON         | 2008 | 18   |
| 20      | $\text{Li}_{1+x}\text{Al}_x\text{Ti}_{2-x}(\text{PO}_4)_3$                                             | 1.0E+02                      | 1.0E-02                    | 1.0E-04                   | NASICON         | 2013 | 19   |
| 21      | $\text{Li}_2\text{S}_2\text{GeS}_2\text{P}_2\text{S}_5$                                                | 1.0E+03                      | 1.0E-01                    | 2.2E-03                   | Sulfide         | 2001 | 16   |
| 22      | 80 $\text{Li}_2\text{S}_2\text{P}_2\text{S}_5$                                                         | 1.5E+04                      | 1.0E+02                    | 7.2E-04                   | Sulfide         | 2003 | 20   |
| 23      | $\text{Li}_2\text{S}_2\text{P}_2\text{S}_5$                                                            | 8.0E+03                      | 1.0E+01                    | 3.2E-03                   | Sulfide         | 2005 | 21   |
| 24      | $\text{Li}_{10}\text{GeP}_2\text{S}_{12}$                                                              | 1.0E+03                      | 1.0E-01                    | 1.2E-02                   | Sulfide         | 2011 | 22   |
| 25      | $\text{Li}_2\text{S}_2\text{P}_2\text{S}_5\text{-P}_2\text{S}_3$                                       | 8.0E+03                      | 1.0E+01                    | 5.4E-03                   | Sulfide         | 2011 | 23   |
| 26      | $\text{Li}_2\text{S-P}_2\text{S}_5\text{-Li}_3\text{N}$                                                | 1.0E+03                      | 1.0E-01                    | 1.4E-03                   | Sulfide         | 2017 | 24   |
| 27      | $\text{Li}_{10+\delta}[\text{Sn}_y\text{Si}_{1-y}\text{P}_{1+\delta}\text{P}_{2-\delta}\text{S}_{12}]$ | 1.5E+04                      | 1.0E+01                    | 1.2E-02                   | Sulfide         | 2017 | 25   |

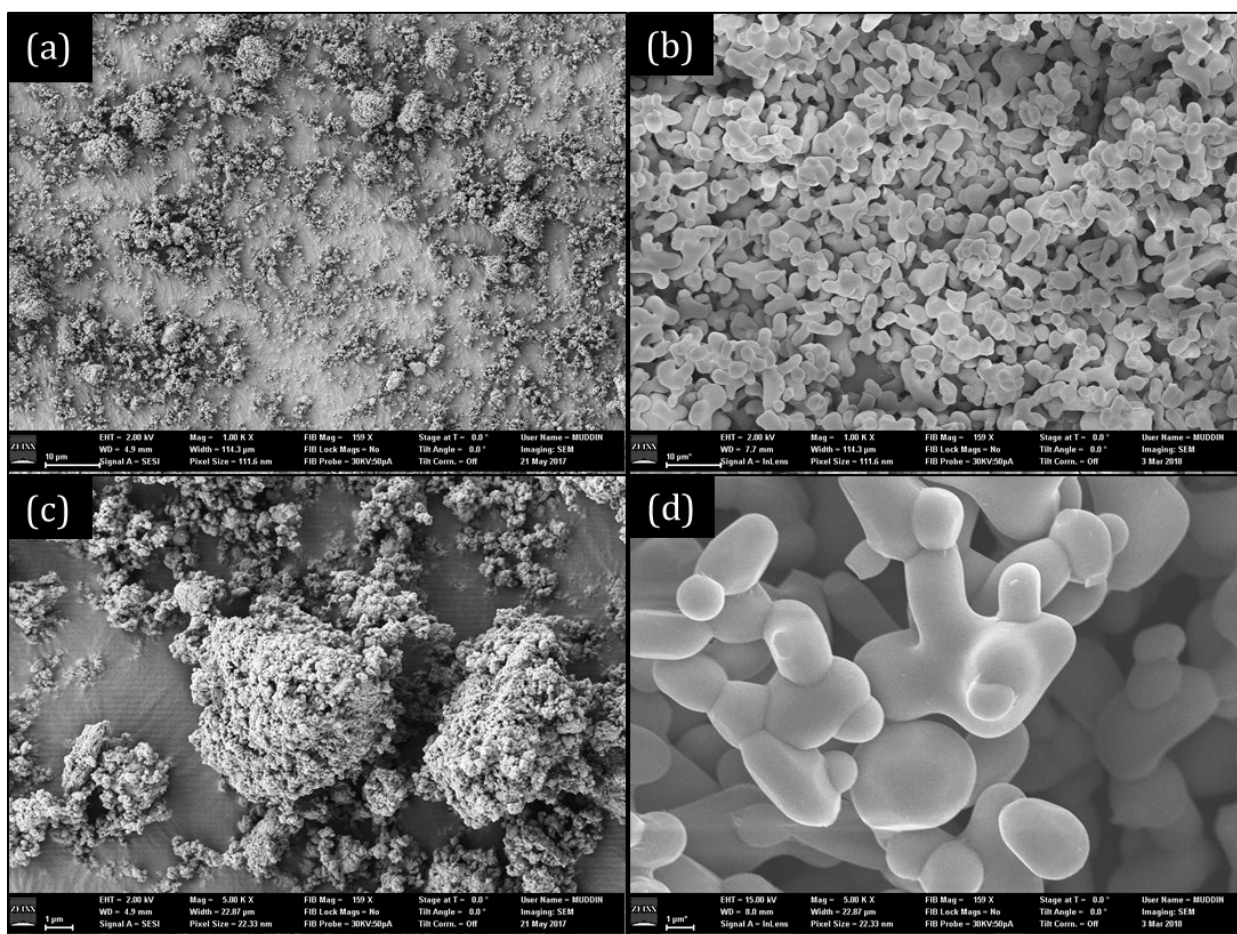

Figure S1: SEM micrograph of (a) experimental LLZO powder and (b) commercial LLZO powder, (c) higher magnification of (a) and (d) higher magnification of (b)

## References

- 1 Y. Shimonishi, A. Toda, T. Zhang, A. Hirano, N. Imanishi, O. Yamamoto and Y. Takeda, *Solid State Ionics*, 2011, **183**, 48–53.
- 2 H. Buschmann, J. Dölle, S. Berendts, A. Kuhn, P. Bottke, M. Wilkening, P. Heitjans, A. Senyshyn, H. Ehrenberg, A. Lotnyk, V. Duppel, L. Kienle and J. Janek, *Phys. Chem. Chem. Phys.*, 2011, **13**, 19378.
- 3 J. L. Allen, J. Wolfenstine, E. Rangasamy and J. Sakamoto, *J. Power Sources*, 2012, **206**, 315–319.
- 4 J. Wolfenstine, E. Rangasamy, J. L. Allen and J. Sakamoto, *J. Power Sources*, 2012, **208**, 193–196.
- 5 J. Tan and A. Tiwari, *Electrochem. Solid-State Lett.*, 2012, **15**, A37.
- 6 E. Rangasamy, J. Wolfenstine, J. Allen and J. Sakamoto, *J. Power Sources*, 2013, **230**, 261–266.
- 7 J. Awaka, A. Takashima, K. Kataoka, N. Kijima, Y. Idemoto and J. Akimoto, *Chem. Lett.*, 2011, **40**, 60–62.
- 8 N. Janani, C. Deviannapoorani, L. Dhivya and R. Murugan, *RSC Adv.*, 2014, **4**, 51228–51238.
- 9 R.-J. Chen, M. Huang, W.-Z. Huang, Y. Shen, Y.-H. Lin and C.-W. Nan, *Solid State Ionics*,

- 2014, **265**, 7–12.
- 10 J.-M. Lee, T. Kim, S.-W. Baek, Y. Aihara, Y. Park, Y.-I. Kim and S.-G. Doo, *Solid State Ionics*, 2014, **258**, 13–17.
  - 11 L. Cheng, J. S. Park, H. Hou, V. Zorba, G. Chen, T. Richardson, J. Cabana, R. Russo and M. Doeff, *J. Mater. Chem. A*, 2014, **2**, 172–181.
  - 12 M. Haaks, J. Kaspar, A. Franz, M. Graczyk-Zajac, R. Riedel and M. Vogel, *Solid State Ionics*, 2016, **287**, 28–35.
  - 13 A. Sharafi, H. M. Meyer, J. Nanda, J. Wolfenstine and J. Sakamoto, *J. Power Sources*, 2016, **302**, 135–139.
  - 14 M. H. Braga, J. A. Ferreira, V. Stockhausen, J. E. Oliveira and A. El-Azab, *J. Mater. Chem. A*, 2014, **2**, 5470–5480.
  - 15 J. Fu, *Solid State Ionics*, 1997, **104**, 191–194.
  - 16 R. Kanno and M. Murayama, *J. Electrochem. Soc.*, 2001, **148**, A742.
  - 17 X. Xu, Z. Wen, X. Yang and L. Chen, *Mater. Res. Bull.*, 2008, **43**, 2334–2341.
  - 18 J. S. Thokchom, N. Gupta and B. Kumar, *J. Electrochem. Soc.*, 2008, **155**, A915.
  - 19 H. Morimoto, H. Awano, J. Terashima, Y. Shindo, S. Nakanishi, N. Ito, K. Ishikawa and S. I. Tobishima, *J. Power Sources*, 2013, **240**, 636–643.
  - 20 A. Hayashi, S. Hama, T. Minami and M. Tatsumisago, *Electrochem. commun.*, 2003, **5**, 111–114.
  - 21 F. Mizuno, A. Hayashi, K. Tadanaga and M. Tatsumisago, *Adv. Mater.*, 2005, **17**, 918–921.
  - 22 N. Kamaya, K. Homma, Y. Yamakawa, M. Hirayama, R. Kanno, M. Yonemura, T. Kamiyama, Y. Kato, S. Hama, K. Kawamoto and A. Mitsui, *Nat. Mater.*, 2011, **10**, 682–686.
  - 23 K. Minami, A. Hayashi, S. Ujiie and M. Tatsumisago, in *Solid State Ionics*, Elsevier, 2011, vol. 192, pp. 122–125.
  - 24 A. Fukushima, A. Hayashi, H. Yamamura and M. Tatsumisago, *Solid State Ionics*, 2017, **304**, 85–89.
  - 25 Y. Sun, K. Suzuki, S. Hori, M. Hirayama and R. Kanno, *Chem. Mater.*, 2017, **29**, 5858–5864.
